# Supplementary material for: Using Network and Complexity Theories to Understand the Functionality of Referral Systems for Surgical Patients in Resource-Limited Settings, the Case of Malawi
Source: PubMed Central journal article supplement (PMC9818113; doi:10.34172/ijhpm.2021.175), 2021-12-22
Supplement: ijhpm-11-2502-s001.pdf [file ijhpm-11-2502-s001.pdf]

**Article title:** Using Network and Complexity Theories to Understand the Functionality of Referral Systems for Surgical Patients in Resource-Limited Settings, the Case of Malawi

**Journal name:** International Journal of Health Policy and Management (IJHPM)

**Authors' information:** Chiara Pittalis<sup>1\*</sup>, Ruairí Brugha<sup>1</sup>, Leon Bijlmakers<sup>2</sup>, Frances Cunningham<sup>3</sup>, Gerald Mwapasa<sup>4</sup>, Morgane Clarke<sup>1</sup>, Henk Broekhuizen<sup>5</sup>, Martilord Ifeanyi<sup>2</sup>, Eric Borgstein<sup>4</sup>, Jakub Gajewski<sup>6</sup>

<sup>1</sup>Department of Epidemiology and Public Health Medicine, Royal College of Surgeons in Ireland, Dublin, Ireland.

<sup>2</sup>Department for Health Evidence, Radboud Institute for Health Sciences, Radboud University Medical Centre, Nijmegen, The Netherlands.

<sup>3</sup>Wellbeing and Preventable Chronic Disease Division, Menzies School of Health Research, Brisbane, QLD, Australia.

<sup>4</sup>College of Medicine, University of Malawi, Blantyre, Malawi.

<sup>5</sup>Department of Health and Society, Wageningen University and Research, Wageningen, The Netherlands.

<sup>6</sup>Institute of Global Surgery, Royal College of Surgeons in Ireland, Dublin, Ireland

(\*Corresponding author: [chiarapittalis@rcsi.ie](mailto:chiarapittalis@rcsi.ie))

**Supplementary file 1.** Data Sources and Integration

Table S1: Data sources and integration

| <b>Network dimensions</b> | <b>Focus of analysis</b>                                                                                                                                    | <b>Data sources</b>                                                                                              |
|---------------------------|-------------------------------------------------------------------------------------------------------------------------------------------------------------|------------------------------------------------------------------------------------------------------------------|
| <b>Structure</b>          | Network form                                                                                                                                                | Relevant government documents and literature                                                                     |
|                           | Complexity of the context                                                                                                                                   | Relevant government documents and literature                                                                     |
|                           | Georeferenced surgical referral patterns                                                                                                                    | DLHs first survey<br>Referrals dataset at sentinel RHs                                                           |
| <b>Functionality</b>      |                                                                                                                                                             |                                                                                                                  |
| <i>Community level</i>    | Service delivery to the population                                                                                                                          | DLHs first survey<br>DLHs interviews and RHs interviews                                                          |
| <i>Network level</i>      | Connectedness and coordination of services                                                                                                                  |                                                                                                                  |
|                           | - Extent of communication and consultation in clinical and referral decision making, including level and quality of information exchange on shared patients | DLHs second survey<br>RHs interviews<br>Referrals dataset at sentinel RHs (for the analysis of referral letters) |
|                           | - Continuous communication and knowledge exchange (feedback)                                                                                                | DLHs second survey<br>RHs interviews                                                                             |
|                           | - Management of patient transfer across facilities                                                                                                          | DLH second survey<br>RHs interviews                                                                              |
| <i>Participant level</i>  | Converging behaviour                                                                                                                                        |                                                                                                                  |
|                           | - Collegial support and collaboration                                                                                                                       | DLHs first survey<br>DLHs and RHs interviews                                                                     |
|                           | - Resource acquisition                                                                                                                                      | DLHs first survey<br>DLHs and RHs interviews                                                                     |
|                           | Diverging behaviour                                                                                                                                         |                                                                                                                  |
|                           | - Patient offloading                                                                                                                                        | DLHs first survey<br>DLHs and RHs interviews                                                                     |
| - Conflict                | RHs interviews                                                                                                                                              |                                                                                                                  |

|                                         |                                                           |                                                         |
|-----------------------------------------|-----------------------------------------------------------|---------------------------------------------------------|
| <b>Complex Adaptive System analysis</b> |                                                           | DLHs first survey<br>DLHs interviews and RHs interviews |
| <b>Performance</b>                      | Timeliness and standard of service delivery               | DLHs interviews and RHs interviews                      |
|                                         | Contribution to health outcomes for the population served | DLHs interviews and RHs interviews                      |
|                                         | Utilisation of resources and cost for patients            | DLHs interviews and RHs interviews                      |

Data collection was jointly conducted by at least one international and one Malawian researcher at all times to minimise the risk of power imbalances. The collection of referral data at the sentinel RHs was done using local data collectors. Overall findings from the multiple data collection tools employed in this study were validated in three ways. Firstly in the DLH surveys, at least two members of the surgical team at each district hospital were present during the administration of the questionnaire to minimise potential recollection bias. These usually consisted of the theatre in charge and another surgical team member (surgical provider, anaesthesia provider or theatre nurse). Each question was read aloud to them by the researchers, and they were asked to discuss the answer and agree on the final response. Secondly, some of the questions were asked again during the DLH semi-structured interviews, giving respondents the opportunity to elaborate further on the answers provided in the survey. Thirdly, DLH survey and interview responses were triangulated with interviews with key informants at the referral facilities and data cross-checked across all databases (e.g. destination of referrals reported by DLHs in the survey vs. actual referral patterns documented in the database at the sentinel RHs). The interpretation of findings presented in this manuscript is the result of long-lasting discussion between all researchers involved – most of whom have long-standing experience working in Sub-Saharan Africa and deep knowledge of the district surgical system. The input of the Malawian researchers was also key in ensuring the interpretation of findings was in line with the situation on the ground.
